# Supplementary material for: Structure-based protein engineering enables prenyl donor switching of a fungal aromatic prenyltransferase
Source: Royal Society of Chemistry journal article supplement (doi:10.1039/c8ob02037j), 2018-01-01
Supplement: c8ob02037j1.pdf [file c8ob02037j1.pdf]

## SUPPORTING INFORMATION

### **Structure-based protein engineering enables prenyl donor switching of a fungal aromatic prenyltransferase**

Peter Mai,<sup>†</sup> Georg Zoicher,<sup>‡</sup> Thilo Stehle,<sup>\*,‡</sup> and Shu-Ming Li<sup>\*,†</sup>

<sup>†</sup> Institut für Pharmazeutische Biologie und Biotechnologie, Philipps-Universität Marburg, Marburg 35037, Germany

<sup>‡</sup> Interfakultäres Institut für Biochemie, Eberhard Karls Universität Tübingen, Tübingen 72076, Germany

\* e-mail: [thilo.stehle@uni-tuebingen.de](mailto:thilo.stehle@uni-tuebingen.de) or [shu-ming.li@staff.uni-marburg.de](mailto:shu-ming.li@staff.uni-marburg.de)

**Table S1** Primers used in this study and protein yields

| Mutant            | Primer    | Sequence (5' → 3')                                     | Yield [mg/L]* |
|-------------------|-----------|--------------------------------------------------------|---------------|
| <i>fgaPT2</i>     |           |                                                        | 3.3           |
| M328A             | 328_GNW_f | TGCCGCTT <b>GCA</b> GCCAATTCACCCTGCACCAGAATGACC        | 2.1           |
|                   | 328_GNW_r | AATTGGC <b>TGC</b> AAGCGGCAGCCTCTCGTCTGGGATAACC        |               |
| M328V             | 328_NNN_f | TGCCGCTT <b>GTG</b> GCCAATTCACCCTGCACCAGAATGACC        | 1.5           |
|                   | 328_NNN_r | AATTGGC <b>ACA</b> AAGCGGCAGCCTCTCGTCTGGGATAACC        |               |
| M328L             | 328_CTA_f | TGCCGCTT <b>CTA</b> GCCAATTCACCCTGCACCAGAATGACC        | 1.6           |
|                   | 328_CTA_r | AATTGGC <b>TAG</b> AAGCGGCAGCCTCTCGTCTGGGATAACC        |               |
| M328I             | 328_AWW_f | TGCCGCTT <b>ATT</b> GCCAATTCACCCTGCACCAGAATGACC        | 1.6           |
|                   | 328_AWW_r | AATTGGC <b>AAT</b> AAGCGGCAGCCTCTCGTCTGGGATAACC        |               |
| M328P             | 328_NNN_f | TGCCGCTT <b>CCT</b> GCCAATTCACCCTGCACCAGAATGACC        | 1.8           |
|                   | 328_NNN_r | AATTGGC <b>AGG</b> AAGCGGCAGCCTCTCGTCTGGGATAACC        |               |
| M328W             | 328_NNN_f | TGCCGCTT <b>TGG</b> GCCAATTCACCCTGCACCAGAATGACC        | 2.7           |
|                   | 328_NNN_r | AATTGGC <b>CCA</b> AAGCGGCAGCCTCTCGTCTGGGATAACC        |               |
| M328F             | 328_TTT_f | TGCCGCTT <b>TTT</b> GCCAATTCACCCTGCACCAGAATGACC'       | 1.5           |
|                   | 328_TTT_r | AATTGGC <b>AAA</b> AAGCGGCAGCCTCTCGTCTGGGATAACC        |               |
| M328Y             | 328_TNT_f | TGCCGCTT <b>TAT</b> GCCAATTCACCCTGCACCAGAATGACC        | 2.5           |
|                   | 328_TNT_r | AATTGGC <b>ATA</b> AAGCGGCAGCCTCTCGTCTGGGATAACC        |               |
| M328T             | 328_NNN_f | TGCCGCTT <b>ACG</b> GCCAATTCACCCTGCACCAGAATGACC        | 2.0           |
|                   | 328_NNN_r | AATTGGC <b>CGT</b> AAGCGGCAGCCTCTCGTCTGGGATAACC        |               |
| M328Q             | 328_NNN_f | TGCCGCTT <b>CAA</b> GCCAATTCACCCTGCACCAGAATGACC        | 1.6           |
|                   | 328_NNN_r | AATTGGC <b>TGA</b> AAGCGGCAGCCTCTCGTCTGGGATAACC        |               |
| M328G             | 328_NNN_f | TGCCGCTT <b>GGG</b> GCCAATTCACCCTGCACCAGAATGACC        | 2.2           |
|                   | 328_NNN_r | AATTGGC <b>CCA</b> AAGCGGCAGCCTCTCGTCTGGGATAACC        |               |
| M328S             | 328_NNN_f | TGCCGCTT <b>TCT</b> GCCAATTCACCCTGCACCAGAATGACC        | 1.6           |
|                   | 328_NNN_r | AATTGGC <b>AGA</b> AAGCGGCAGCCTCTCGTCTGGGATAACC        |               |
| M328C             | 328_TNT_f | TGCCGCTT <b>TGT</b> GCCAATTCACCCTGCACCAGAATGACC        | 2.6           |
|                   | 328_TNT_r | AATTGGC <b>ACA</b> AAGCGGCAGCCTCTCGTCTGGGATAACC        |               |
| M328N             | 328_AWW_f | TGCCGCTT <b>AAT</b> GCCAATTCACCCTGCACCAGAATGACC        | 3.2           |
|                   | 328_AWW_r | AATTGGC <b>ATT</b> AAGCGGCAGCCTCTCGTCTGGGATAACC        |               |
| M328K             | 328_AWW_f | TGCCGCTT <b>AAA</b> GCCAATTCACCCTGCACCAGAATGACC        | 2.7           |
|                   | 328_AWW_r | AATTGGC <b>TTT</b> AAGCGGCAGCCTCTCGTCTGGGATAACC        |               |
| M328R             | 328_NNN_f | TGCCGCTT <b>CGG</b> GCCAATTCACCCTGCACCAGAATGACC        | 1.7           |
|                   | 328_NNN_r | AATTGGC <b>CCG</b> AAGCGGCAGCCTCTCGTCTGGGATAACC        |               |
| M328H             | 328_CAT_f | TGCCGCTT <b>CAT</b> GCCAATTCACCCTGCACCAGAATGACC        | 3.1           |
|                   | 328_CAT_r | AATTGGC <b>ATG</b> AAGCGGCAGCCTCTCGTCTGGGATAACC        |               |
| M328E             | 328_GNW_f | TGCCGCTT <b>GAA</b> GCCAATTCACCCTGCACCAGAATGACC        | 2.0           |
|                   | 328_GNW_r | AATTGGC <b>TTCA</b> AAGCGGCAGCCTCTCGTCTGGGATAACC       |               |
| M328D             | 328_GAC_f | TGCCGCTT <b>GAC</b> GCCAATTCACCCTGCACCAGAATGACC        | 1.5           |
|                   | 328_GAC_r | AATTGGC <b>GTC</b> AAGCGGCAGCCTCTCGTCTGGGATAACC        |               |
| L263A_M328A       | L263A_f   | CTACCTG <b>GCA</b> GAGCAGATGGTTTCTACTAGAAGCCATGGAGG    | 1.3           |
|                   | L263A_r   | TCTGTCT <b>TGC</b> CAGGTAGATCTTGATTCTCGACTTGGCAGG      |               |
| L263A_M328A_Y398F | Y398F_f   | CCACGCC <b>TTT</b> TATATCCTTCTCTACAGGGACCGTACC         | 1.3           |
|                   | Y398F_r   | AAGGATATA <b>AAA</b> GGCGTGGAGGTAGTTAAGTTTGTTCATGATCCG |               |

\* The purity of the recombinant proteins was determined at 75% – 80%. The protein yields were calculated by taking the impurities into consideration.

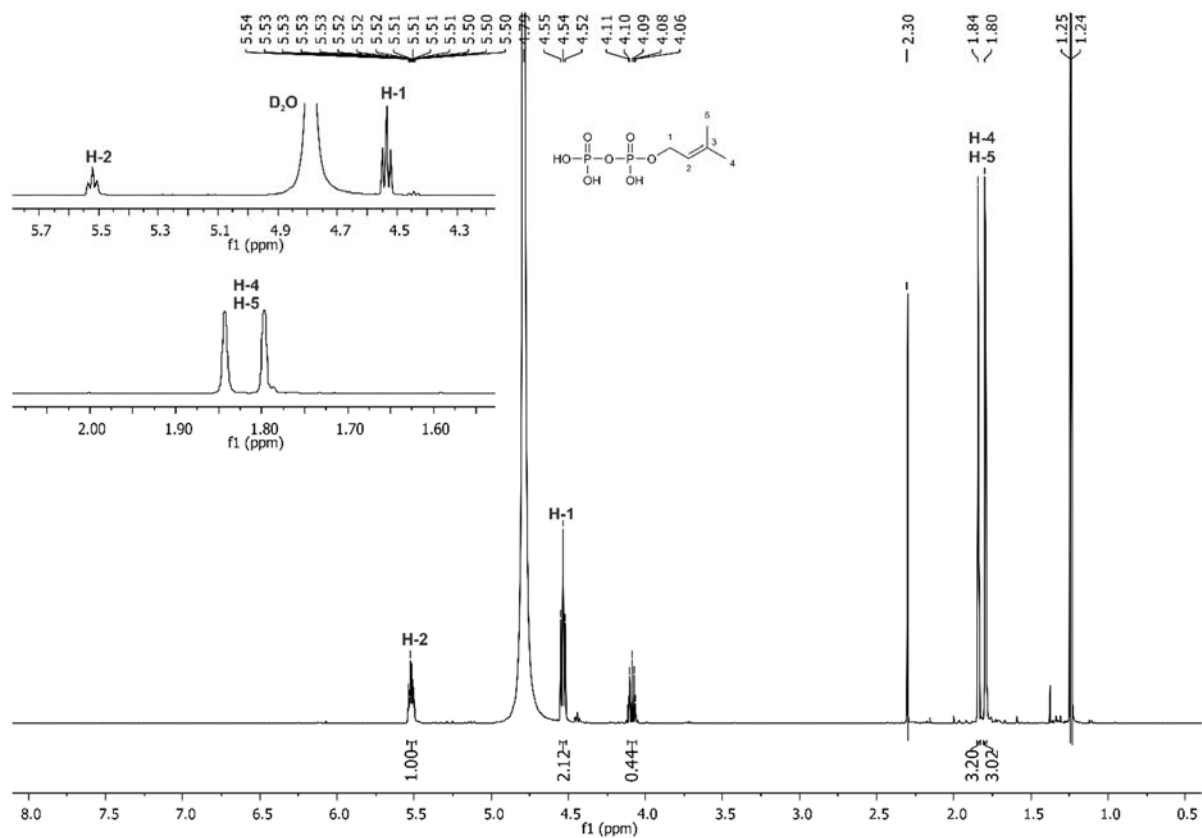

**Figure S1**  $^1\text{H}$  NMR spectrum of dimethylallyl diphosphate (DMAPP) (500 MHz,  $\text{D}_2\text{O}$ )

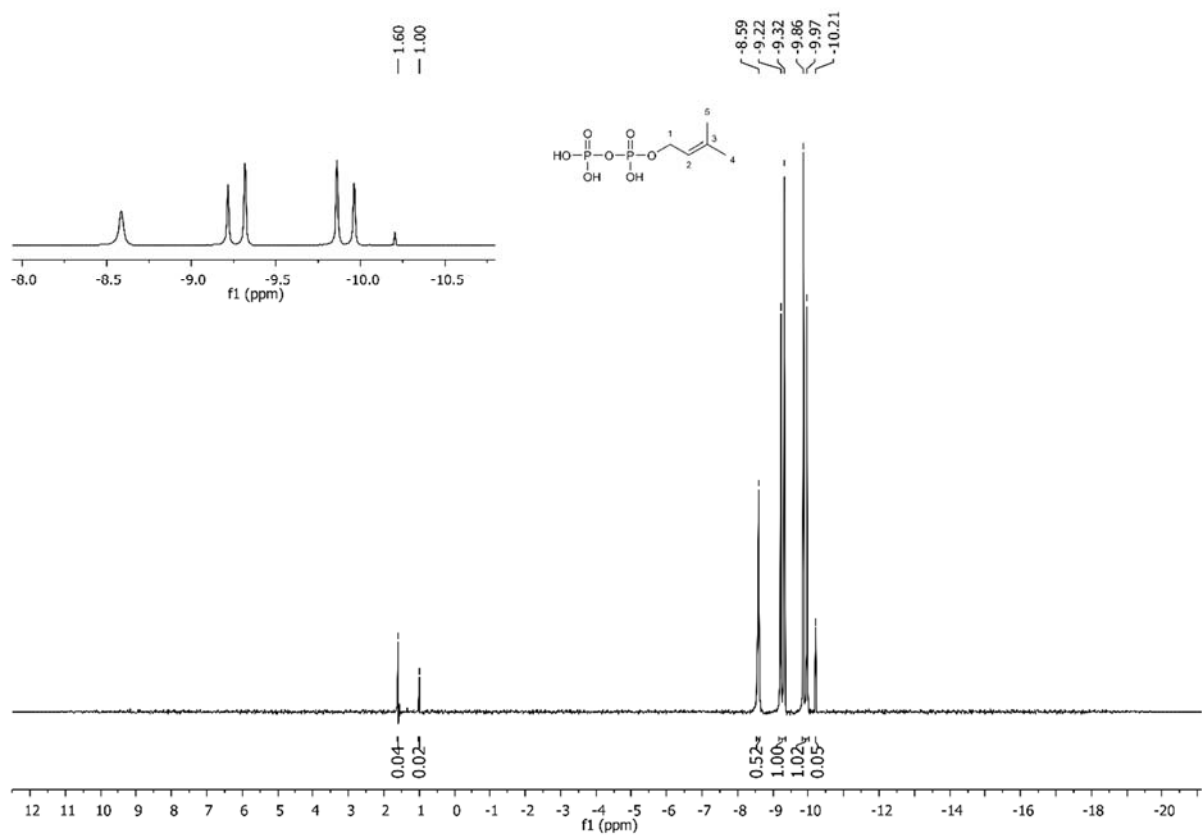

**Figure S2**  $^{31}\text{P}$  NMR spectrum of dimethylallyl diphosphate (DMAPP) (200 MHz,  $\text{D}_2\text{O}$ )

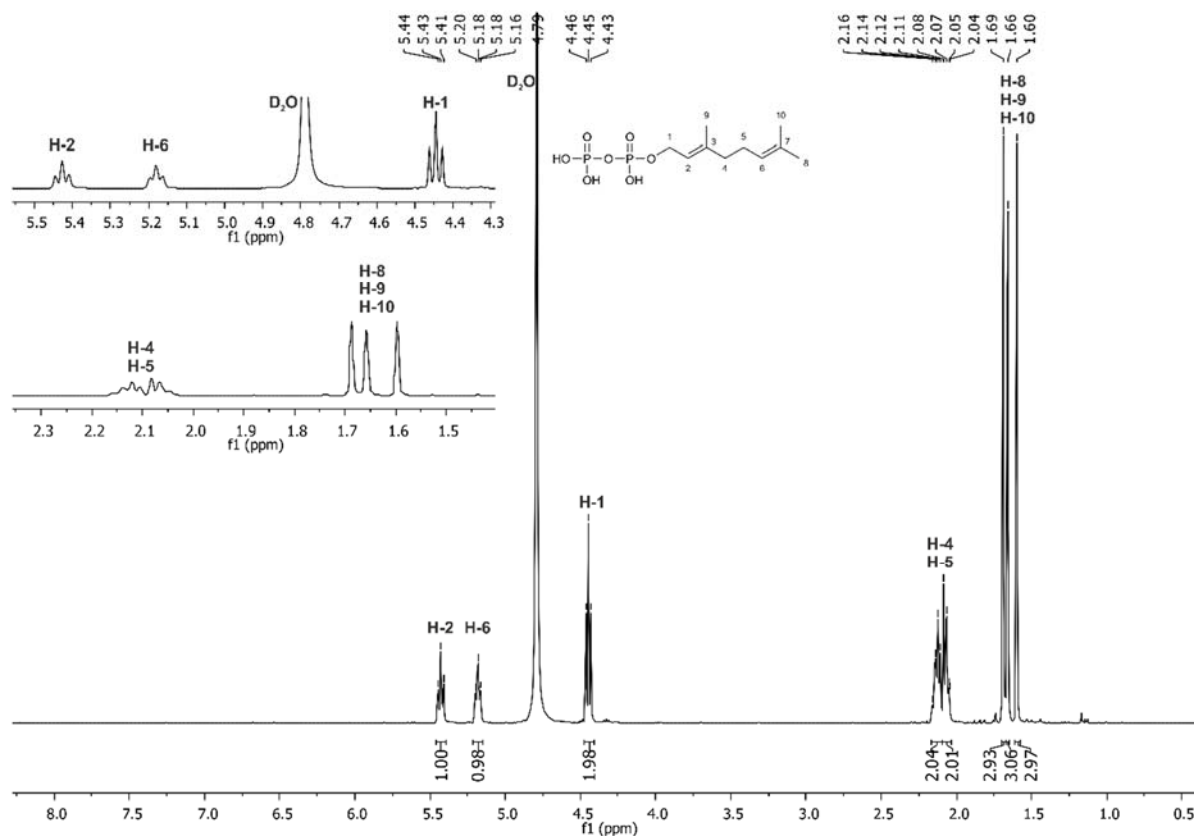

Figure S3  $^1\text{H}$  NMR spectrum of geranyl diphosphate (GPP) (500 MHz,  $\text{D}_2\text{O}$ )

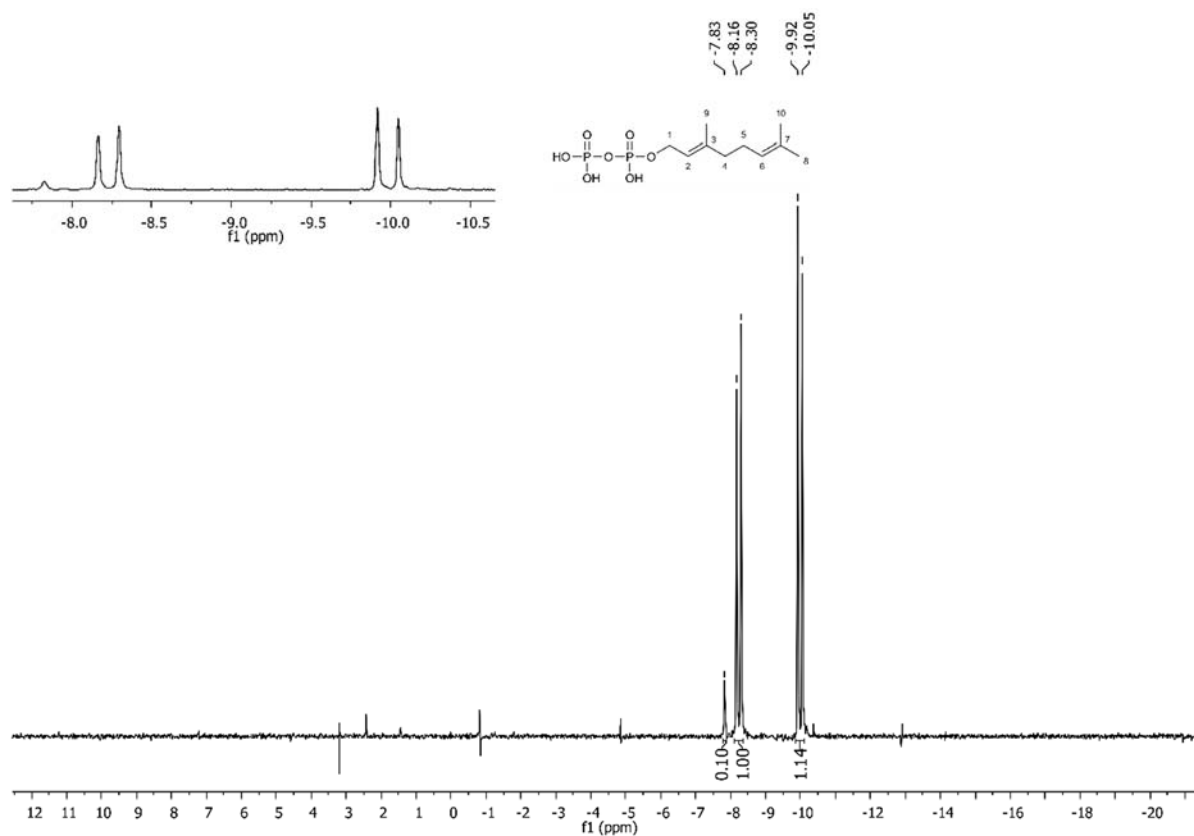

Figure S4  $^{31}\text{P}$  NMR spectrum of geranyl diphosphate (GPP) (200 MHz,  $\text{D}_2\text{O}$ )

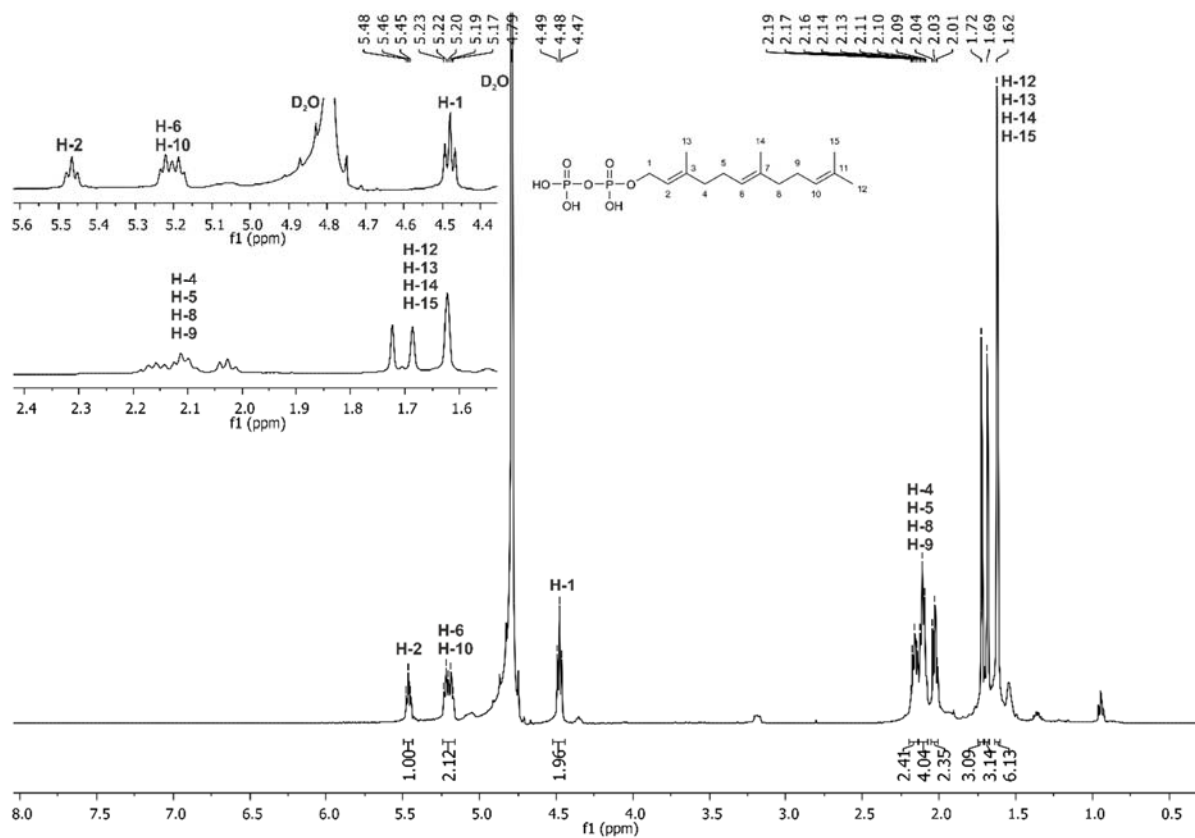

Figure S5  $^1\text{H}$  NMR spectrum of farnesyl diphosphate (FPP) (500 MHz,  $\text{D}_2\text{O}$ )

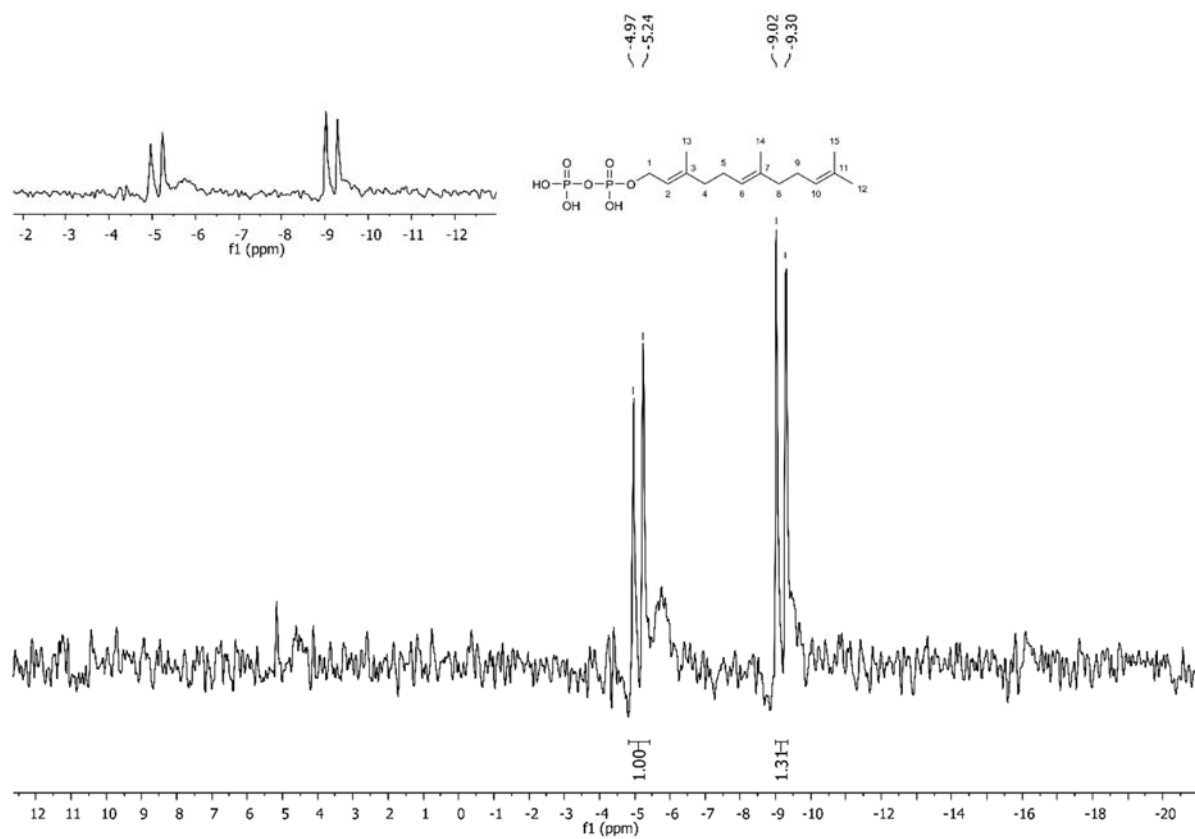

Figure S6  $^{31}\text{P}$  NMR spectrum of farnesyl diphosphate (FPP) (200 MHz,  $\text{D}_2\text{O}$ )

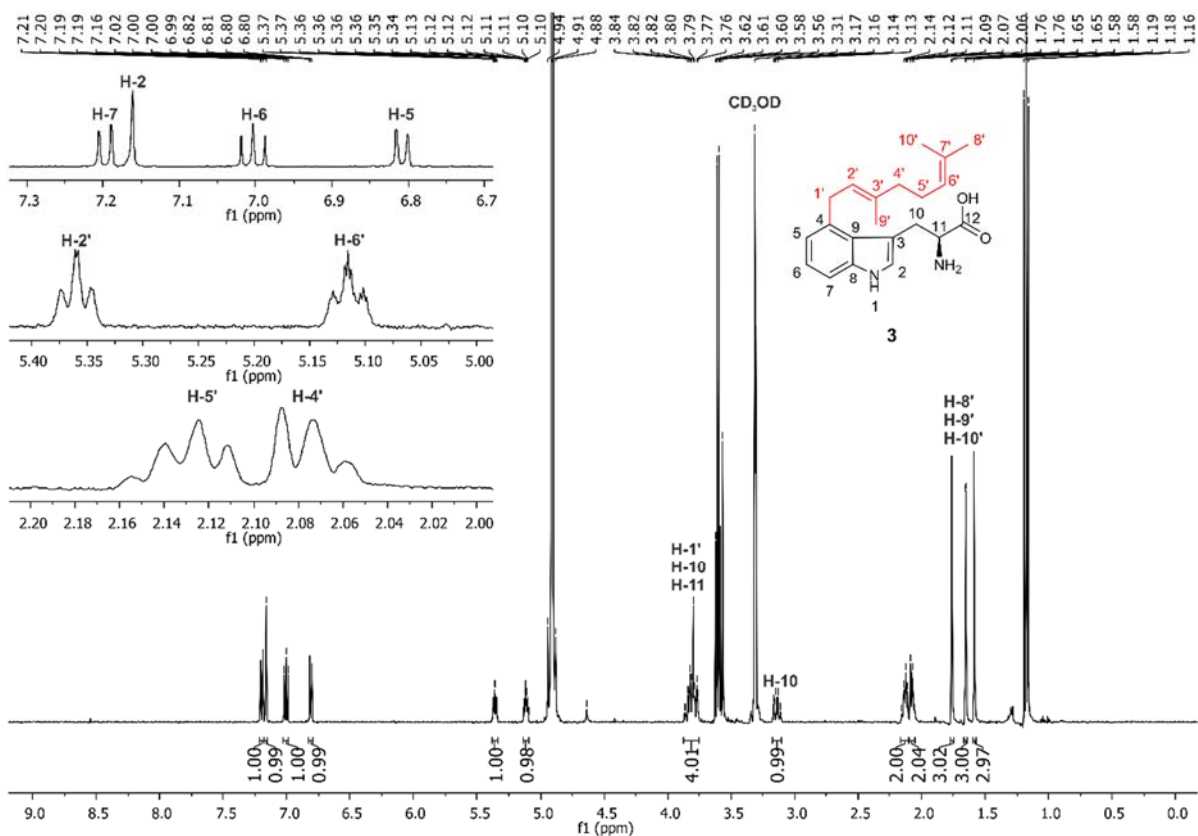

**Figure S7**  $^1\text{H}$  NMR spectrum of 4-geranyltryptophan (**3**) (500 MHz,  $\text{CD}_3\text{OD}$ )

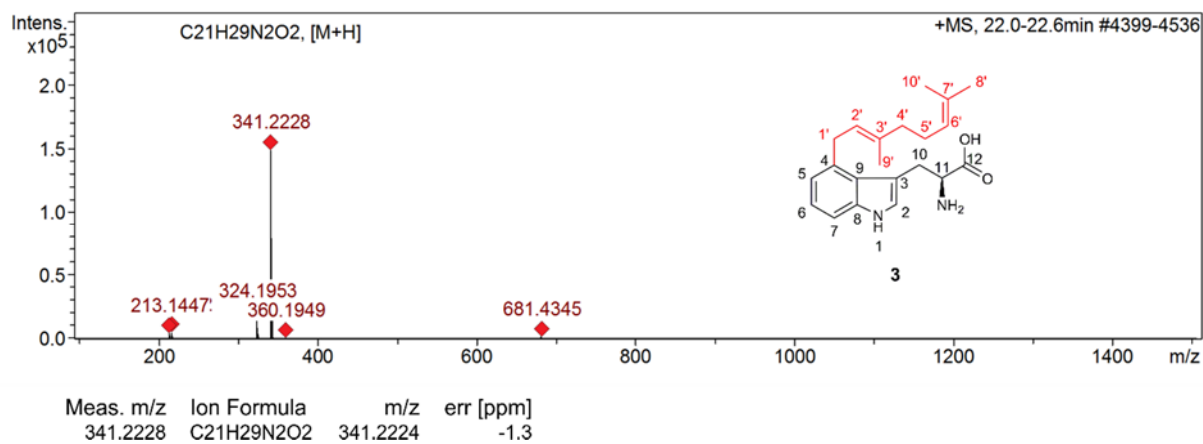

**Figure S8** Positive HR-ESI-MS spectrum of 4-geranyltryptophan (**3**)

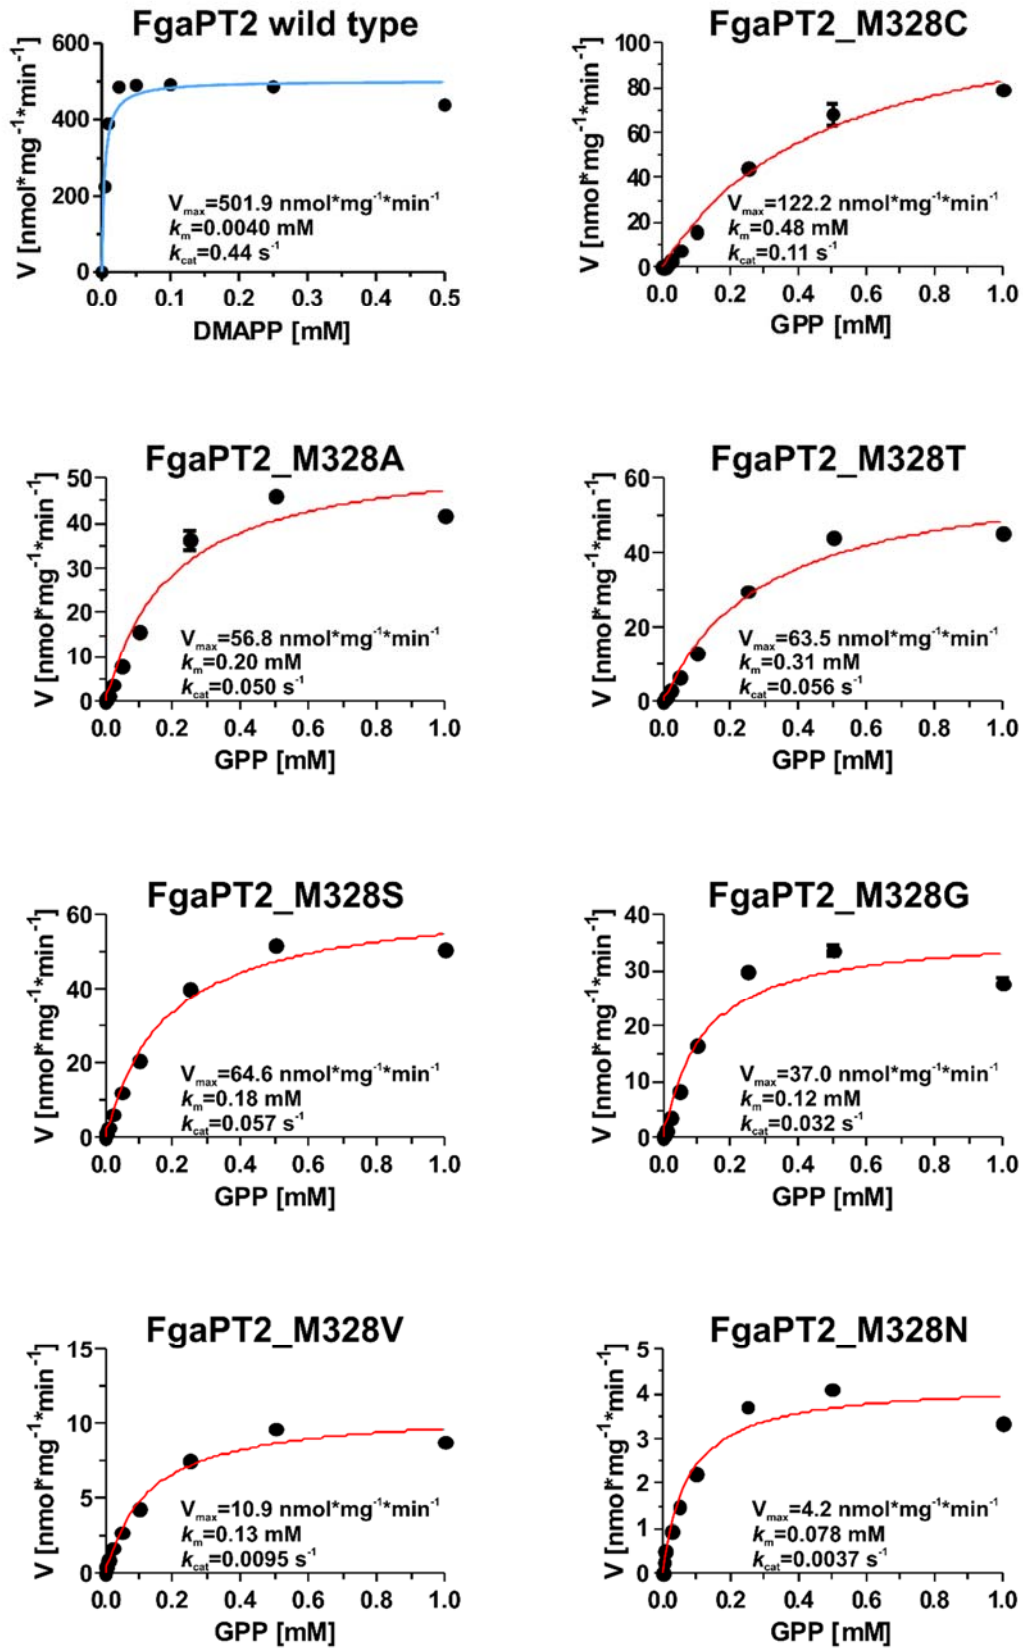

**Figure S9** Kinetic parameters of FgaPT2 wild type and FgaPT2\_M328 mutants toward DMAPP and GPP with 1
